# Supplementary material for: Implementing reactive secondary electrospray ionization based on gas–droplet reactions for VOC analysis
Source: Royal Society of Chemistry journal article supplement (doi:10.1039/d2an01422j), 2022-01-01
Supplement: d2an01422j1.pdf [file d2an01422j1.pdf]

## Supporting information

### Implementing reactive secondary electrospray ionization based on gas-droplet reactions for VOCs analysis

Quan Yu <sup>a,\*</sup>, Jing Gao <sup>a</sup>, Xiaohua Yu <sup>b</sup>, Jianbo Shi <sup>b</sup>, Lin Lin <sup>c,\*</sup>, Xiaohao Wang <sup>a</sup>

<sup>a</sup> Division of Advanced Manufacturing, Shenzhen International Graduate School, Tsinghua University, Shenzhen, 518055, China.

<sup>b</sup> Open FIESTA, Shenzhen International Graduate School, Tsinghua University, Shenzhen, 518055, China.

<sup>c</sup> Materials Characterization & Preparation Center, Southern University of Science and Technology, Shenzhen 518055, China.

#### Content

|                                                                                                              |   |
|--------------------------------------------------------------------------------------------------------------|---|
| 1. MS <sup>n</sup> spectra of the reaction-related ions in reactive SESI-MS analysis of propionaldehyde..... | 2 |
| 2. Influence of some experimental parameters on the reaction efficiency.....                                 | 3 |
| 3. Reactive SESI-MS analysis of formaldehyde with different derivatization reagents.....                     | 4 |
| 4. Reactive SESI-MS analysis of butanone and butyraldehyde by Girard T solution.....                         | 5 |
| 5. Silver-containing complex ions in exhaled breath of cultured non-diabetic and diabetic mice.....          | 6 |

---

\* Corresponding author.

E-mail address: [yu.quan@sz.tsinghua.edu.cn](mailto:yu.quan@sz.tsinghua.edu.cn) (Q. Yu)

E-mail address: [linl@sustech.edu.cn](mailto:linl@sustech.edu.cn) (L. Lin)

### MS<sup>n</sup> spectra of the reaction-related ions in reactive SESI-MS analysis of propionaldehyde

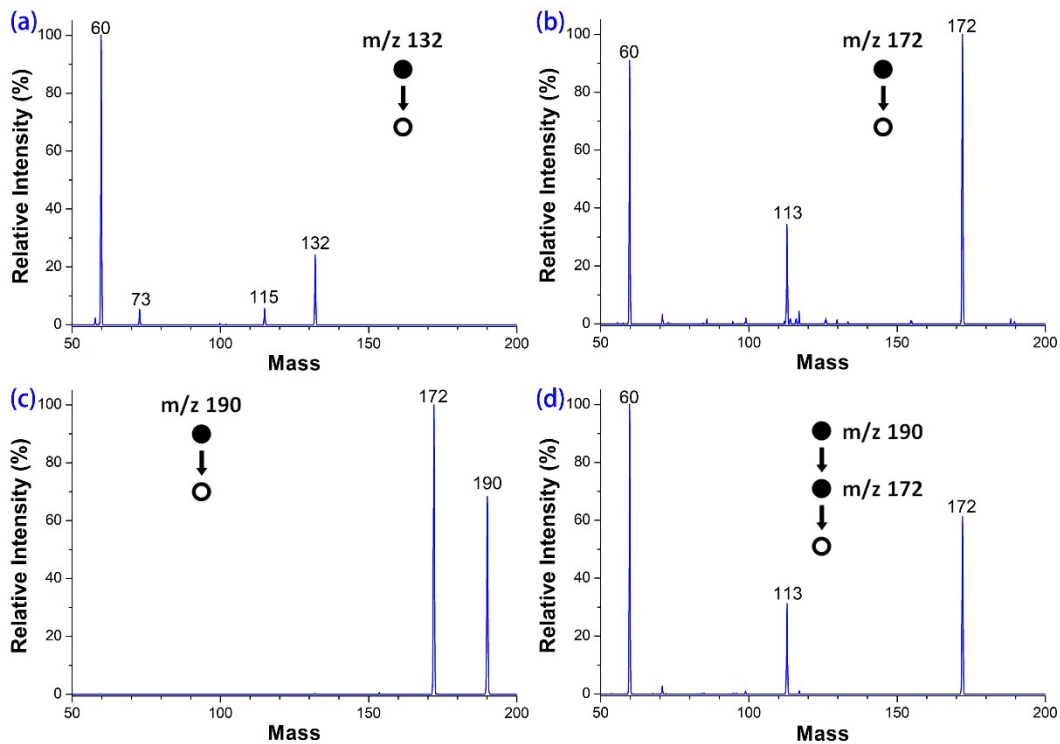

**Fig. S1.** MS<sup>2</sup> spectra of (a) Girard T ion (m/z 132), (b) product ion (m/z 172), and (c) intermediate ion (m/z 190). (d) MS<sup>3</sup> spectrum of the fragmentation ion (m/z 172) from CID of the intermediate ion (m/z 190), which has the same ion composition with the reaction product ion (m/z 172). As a characteristic functional group of Girard T, protonated trimethylamine ion (m/z 60) is observed in the three compounds, indicating that both the intermediate and product ions are derived from Girard T.

### Influence of some experimental parameters on the reaction efficiency

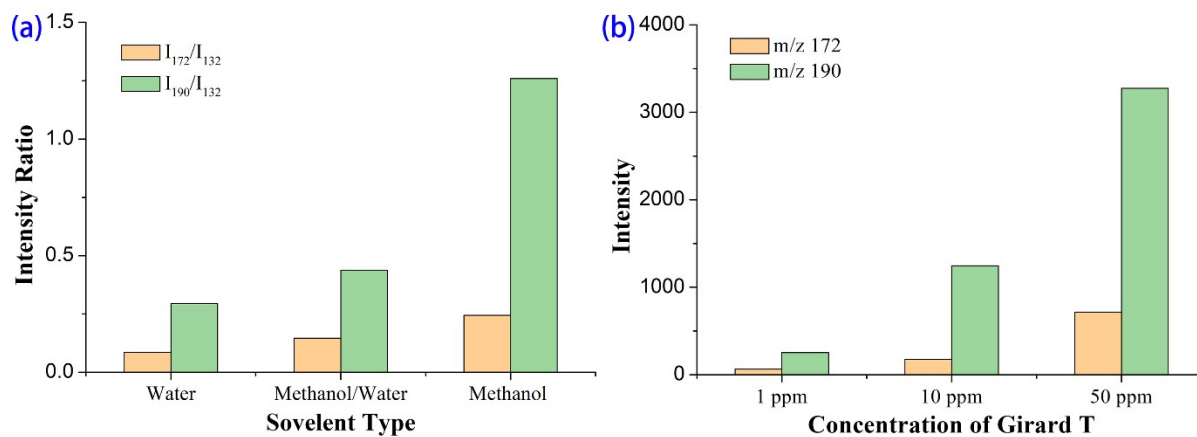

**Fig. S2.** (a) The intensity ratio of the reactant (Girard T, m/z 132) ion and the reaction product ions (m/z 172, m/z 190) obtained using different types of solvent (water, methanol/water (1:1) mixture, and methanol). (b) Intensities of the reaction intermediate ion (m/z 190) and product ion (m/z 172) acquired using different concentrations (1 ppm, 10 ppm and 50 ppm) of Girard T solutions.

### Reactive SESI-MS analysis of formaldehyde with different derivatization reagents

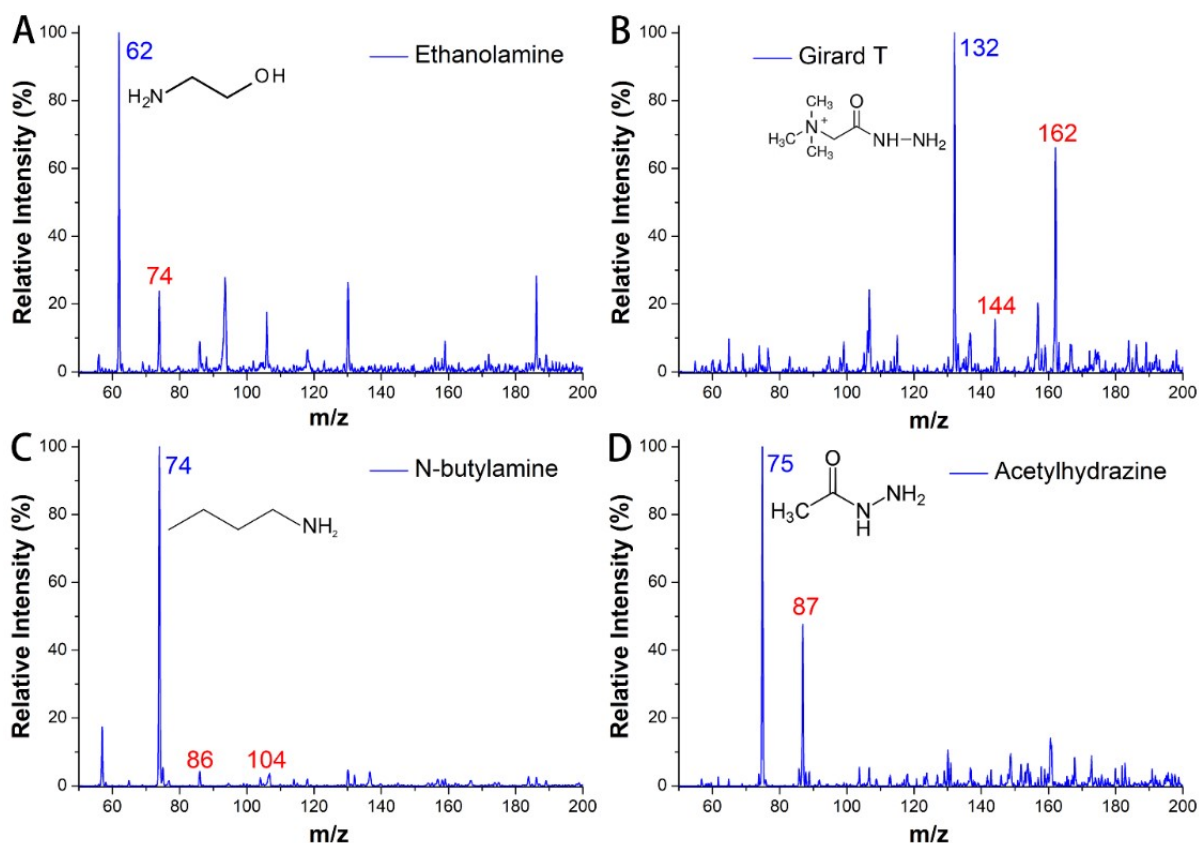

**Fig. S3.** Reactive SESI-MS spectra of formaldehyde using (A) ethanolamine, (B) Girard T, (C) N-butylamine, and (D) acetylhydrazide as the derivatization reagents. Online derivatization of formaldehyde (marked as F, molecular mass 29) can be induced using a variety of reagents (marked as R), such as ethanolamine ( $m/z$  62), Girard T ( $m/z$  132), n-butylamine ( $m/z$  74), and acetylhydrazide ( $m/z$  75). The reactions between formaldehyde and these additives generally take place through the Schiff base formation mechanism, namely, an initial addition reaction and then a dehydration process. The product ions of Schiff base formation  $[R+F-H_2O+H]^+$  or the intermediate ions  $[R+F+H]^+$  can be found in all spectra. Since the generation of those derivative ions is related to formaldehyde in the samples, they can be used as markers to indicate the content of formaldehyde.

## Reactive SESI-MS analysis of butanone and butyraldehyde by Girard T solution

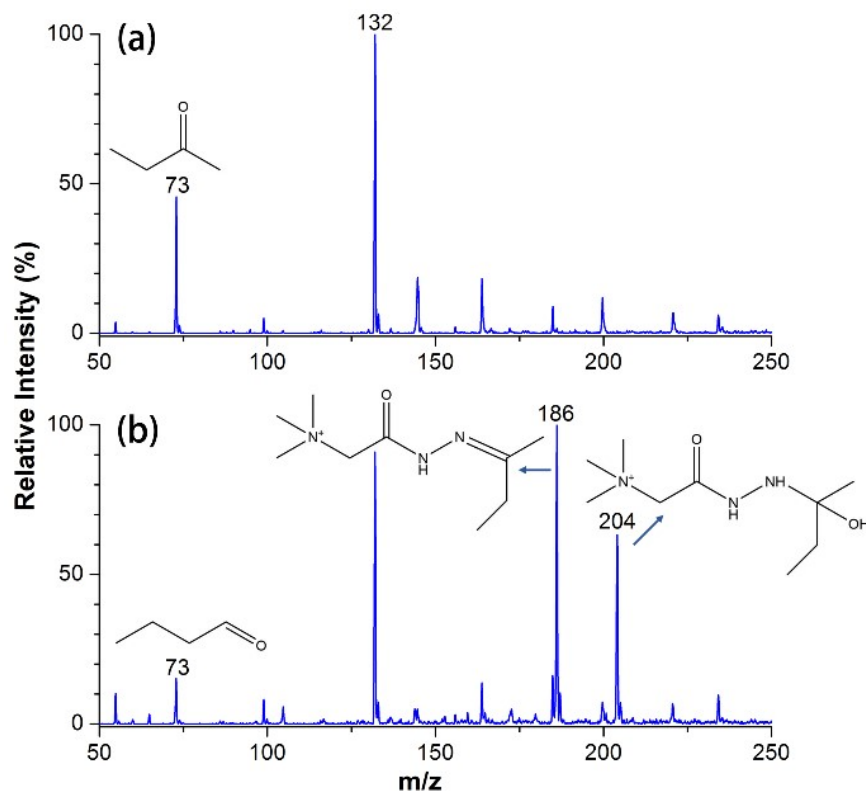

**Fig. S4.** Reactive SESI mass spectra of (a) butanone, and (b) butyraldehyde, in which Girard T was used as the derivatization reagent. Ketones have one more alkyl group nearing the carbonyl structure that pushes electrons to the neighboring electrophilic center, leading to less electrophilic and reactive nucleophilic addition. Moreover, since the reaction starts with nucleophile attacking the carbon in the carbonyl group, more hydrogen atoms in ketones will produce more steric hindrance for nucleophile approaching. In the SESI process, the addition reaction of Girard T and butanone rarely occurred, so no obvious product ions were observed. In contrast, a certain amount of addition products, including the hydrazine ion ( $m/z$  204) and its dehydration ion ( $m/z$  186), were produced from the online derivatization of butyraldehyde. Girard T carries a formal charge on the nitrogen atom, thus transforming aldehydes into products with charged (quaternary ammonium) and easily ionizable (secondary amine for positive-ion mode) groups which improve mass spectrometric response.

## Silver-containing complex ions in exhaled breath of cultured non-diabetic and diabetic mice

**Table S1** The Ag-containing complex ions detected in the exhaled breath from the cultured nondiabetic and diabetic mice using reactive SESI-MS. The most proposed molecular formula, signal intensity, and mass error were also given. The types of these ions are roughly determined from their signal changes in EIC. Specifically, ions detected in the mouse with diabetes have significantly higher intensities than that in the normal mouse are classified as potential biomarkers for diabetes. Ions have fewer differences in signal intensities between the two samples are classified as suspect biomarkers. Additionally, the remaining ion pairs can be divided into two other categories: air or solvent background. Thereinto, the ion intensity of the former does not change with sample injection, while the intensity change of the latter corresponds to the injection process, but is independent of the mouse type.

| Type                      | Measured m/z value | Mass error (ppm) | Molecular formula                                               | Intensity (nondiabetic) | Intensity (diabetic) |
|---------------------------|--------------------|------------------|-----------------------------------------------------------------|-------------------------|----------------------|
| Silver ion                | 106.9050           | 4.26             | Ag                                                              | 248587                  | 272442               |
|                           | 108.9050           | 7.28             |                                                                 | 232747                  | 251268               |
| Potential biomarkers      | 164.9464           | -0.06            | C <sub>3</sub> H <sub>6</sub> OAg                               | 171                     | 2595                 |
|                           | 166.9456           | -2.83            |                                                                 | 147                     | 2349                 |
|                           | 347.0168           | -0.26            | C <sub>12</sub> H <sub>12</sub> N <sub>6</sub> Ag               | 1                       | 1231                 |
|                           | 349.0161           | -1.30            |                                                                 | 1                       | 1344                 |
| Suspected biomarkers      | 222.9882           | -0.33            | C <sub>6</sub> H <sub>12</sub> O <sub>2</sub> Ag                | 1421                    | 1979                 |
|                           | 224.9877           | -1.05            |                                                                 | 1036                    | 2049                 |
|                           | 281.0297           | -1.6             | C <sub>9</sub> H <sub>18</sub> O <sub>3</sub> Ag                | 9074                    | 17097                |
|                           | 283.0293           | -1.77            |                                                                 | 7908                    | 14607                |
|                           | 306.0015           | -0.26            | C <sub>10</sub> H <sub>15</sub> O <sub>4</sub> Ag               | 1111                    | 1318                 |
|                           | 308.0006           | -2.08            |                                                                 | 998                     | 1075                 |
| Sample background         | 288.9747           | 3.51             | C <sub>8</sub> H <sub>10</sub> O <sub>3</sub> N <sub>2</sub> Ag | 26907                   | 34974                |
|                           | 290.9742           | 2.92             |                                                                 | 25720                   | 31012                |
|                           | 289.9783           | -1.83            | C <sub>4</sub> H <sub>7</sub> ON <sub>8</sub> Ag                | 1582                    | 957                  |
|                           | 291.9777           | -2.70            |                                                                 | 807                     | 1182                 |
|                           | 306.9853           | -0.94            | C <sub>9</sub> H <sub>8</sub> N <sub>6</sub> Ag                 | 73032                   | 121939               |
|                           | 308.9850           | -0.82            |                                                                 | 67328                   | 110815               |
|                           | 307.9887           | 2.10             | C <sub>3</sub> H <sub>13</sub> O <sub>6</sub> N <sub>4</sub> Ag | 4246                    | 7513                 |
|                           | 309.9883           | 1.88             |                                                                 | 3889                    | 6575                 |
|                           | 330.0013           | -0.84            | C <sub>12</sub> H <sub>15</sub> O <sub>4</sub> Ag               | 144918                  | 209241               |
|                           | 332.0009           | -1.03            |                                                                 | 133592                  | 189842               |
|                           | 331.0048           | -1.74            | C <sub>6</sub> H <sub>10</sub> ON <sub>9</sub> Ag               | 11503                   | 189842               |
| 333.0044                  | -1.93              | 10980            |                                                                 | 15321                   |                      |
| Air or solvent background | 123.9312           | 0.86             | H <sub>3</sub> NAg                                              | 2206                    | 1212                 |
|                           | 125.9309           | 1.14             |                                                                 | 2310                    | 1265                 |
|                           | 124.9152           | 0.73             | H <sub>2</sub> OAg                                              | 3906                    | 4794                 |
|                           | 126.9149           | 0.73             |                                                                 | 4133                    | 3891                 |
|                           | 147.9309           | -1.31            | C <sub>2</sub> H <sub>3</sub> NAg                               | 465888                  | 564490               |
|                           | 149.9307           | -0.38            |                                                                 | 449845                  | 536517               |
|                           | 165.9415           | -0.95            | C <sub>2</sub> H <sub>5</sub> ONAg                              | 27772                   | 37494                |
|                           | 167.9413           | -0.13            |                                                                 | 25721                   | 35892                |
|                           | 188.9575           | -0.76            | C <sub>4</sub> H <sub>6</sub> N <sub>2</sub> Ag                 | 152811                  | 177229               |
|                           | 190.9572           | -0.55            |                                                                 | 139122                  | 169552               |

|          |        |                                                    |       |       |
|----------|--------|----------------------------------------------------|-------|-------|
| 189.9610 | -9.411 | CH <sub>9</sub> O <sub>3</sub> NAg                 | 5558  | 6576  |
| 191.9606 | -9.641 |                                                    | 5284  | 5759  |
| 212.9675 | -0.18  | C <sub>4</sub> H <sub>10</sub> O <sub>3</sub> Ag   | 833   | 1128  |
| 214.9669 | -1.40  |                                                    | 800   | 1092  |
| 223.9833 | -0.99  | C <sub>3</sub> H <sub>11</sub> O <sub>2</sub> NAg  | 4372  | 2185  |
| 225.9829 | 0.50   |                                                    | 3555  | 2021  |
| 269.0298 | -1.26  | C <sub>8</sub> H <sub>18</sub> O <sub>3</sub> Ag   | 10523 | 11214 |
| 271.0294 | -1.48  |                                                    | 9976  | 10208 |
| 301.0712 | -1.36  | C <sub>13</sub> H <sub>22</sub> OAg                | 6636  | 5502  |
| 303.0708 | -1.56  |                                                    | 6665  | 5277  |
| 311.0402 | -1.62  | C <sub>10</sub> H <sub>20</sub> O <sub>4</sub> Ag  | 9195  | 9738  |
| 313.0398 | -1.81  |                                                    | 8101  | 7419  |
| 333.0972 | -1.88  | C <sub>14</sub> H <sub>26</sub> O <sub>2</sub> Ag  | 1925  | 1876  |
| 335.0969 | -1.75  |                                                    | 1740  | 1704  |
| 355.1179 | -1.86  | C <sub>17</sub> H <sub>28</sub> OAg                | 6403  | 5479  |
| 357.1177 | -1.47  |                                                    | 6071  | 5513  |
| 361.1285 | -1.73  | C <sub>16</sub> H <sub>30</sub> O <sub>2</sub> Ag  | 9136  | 9676  |
| 363.1281 | -1.89  |                                                    | 8189  | 8815  |
| 389.1595 | 1.07   | C <sub>16</sub> H <sub>32</sub> ON <sub>3</sub> Ag | 1768  | 1579  |
| 391.1593 | 1.42   |                                                    | 1361  | 1607  |
